# Supplementary material for: Zebrafish as a Model for Studying Age-Dependent Sarcopenia and Frailty
Source: Preprints.org preprint supplement (doi:10.20944/preprints202405.1073.v1), 2024-05-16
Supplement: Supplementary file 3 [file supplementary]

Supplementary Materials

**Table S1.** Frailty index.

| Parameter | 2 mo | | 10 mo | | 30 mo | | 60 mo | |
| --- | --- | --- | --- | --- | --- | --- | --- | --- |
| **mean ± SD** | **FI** | **mean ± SD** | **FI** | **mean ± SD** | **FI** | **mean ± SD** | **FI** |
| Total distance (cm) | 4667.74 ± 1386.53 | 0 | 5143.71 ± 1186.04 | 0 | 3164.34 ± 1420.14 | 0.25 | 2958.52 ± 723.49 | 0.25 |
| Max speed (cm/s) | 35.30 ± 11.63 | 0 | 31.96 ± 6.47 | 0 | 25.83 ± 5.79 | 0.25 | 18.55 ± 7.65 | 0.25 |
| Mean speed (cm/s) | 4.18 ± 1.02 | 0 | 4.61 ± 0.55 | 0 | 2.64 ± 1.18 | 0 | 2.46 ± 0.60 | 0.25 |
| Muscle weight/body weight ratio | 0.45 ± 0.04 | 0 | 0.48 ± 0.03 | 0 | 0.42 ± 0.08 | 0 | 0.39 ± 0.04 | 0.25 |
| FI Mean |  | 0 |  | 0 |  | 0.13 ± 0.14 |  | 0.25 ± 0.00 |

Reference values from zebrafish used to develop a FI. Notes: values represent the mean ± SD for parameters measured from the 2 mo. 10 mo. 30 mo and 60 mo zebrafish (*n* = 8 animals/group). cm = centimeters; cm/s = centimeters/second.
